# Supplementary material for: Sporadic PCDH18 somatic mutations in EpCAM-positive hepatocellular carcinoma
Source: Cancer Cell Int. 2017 Oct 23;17:94. doi: 10.1186/s12935-017-0467-x (PMC5654054; doi:10.1186/s12935-017-0467-x)
Supplement: Supplementary file 2 — Additional file 2. The number of point mutations in 300 liver cancers and the function of 13 novel mutated genes. [file 12935_2017_467_MOESM2_ESM.xlsx]

## Sheet: Supplementaly Table 2
Additional file 2
The number of point mutations in 300 liver cancers and the function of 13 novel mutated genes
Gene	Function	Number of point mutation in 300 liver cancers	Number of indel in 300 liver cancers
PCDH18	Function of this gene in humans is unclear. Some studies have shown that PCDH18 deletion may be associated with altered brain development, intellectual disability, and multiple malformations with pulmonary hypertension.	4	0
KIAA2026	Function is unknown.	2	1
ALKBH3	This gene removes methyl groups from 1-methyladenosine and 3-methylcytosine in DNA and RNA, and has the role in maintaining genomic integrity.	0	0
CCDC168	Function is unknown.	0	0
CYP2R1	This gene is a member of the cytochrome P450 superfamily of enzymes and have been considered as candidates for the enzyme responsible for the conversion of vitamin D to 25(OH)D3.	1	1
PER1	This gene is an important circadian clock gene. And also seems to function as a tumor suppressor by regulating cell cycle genes and interacting with key DNA damage-activated checkpoint proteins.	0	0
OSCP1	This gene mediates various kind if organic solutions in a pH-dependant and sodium-independent manner on the basal membrane of placenta. Recently study shown to be a tumor suppressor gene and play an important role in lots of cellular processes such as cell proliferation and survival via modulating cell cycle S phase delay and energe metabolism of tumor cells.	1	0
ITGB8	This protein noncovalently binds to an alpha subunit to form a heterodimeric integrin complex (integrin avb8). This complex is an important TGF-b activator and can regulate cell functions in a TGF-b independent and TGF-b dependant manner.	1	1
INTS12	This gene is a subunit of the Integrator complex. This complex was shown to stably accompany the C-terminal tail of RNA polymerase II (POLII) and at a molecular level has been implicated in small nuclear RNA biogenesis dynein recruitment to the nuclear envelope at the mitotic onset and with POLII pause and release. In HeLa cells, this gene was specifically shown to be required for the maintenance…	1	0
TECTA	This gene is a one of the major non-collagenous glycoproteins of the tectorial membrane, a non-cellular matrix overlying the cochlear neuroepithelium that lies over stereocilia of the hair cells and is critical for the mechanical amplification and transmission of sound.	3	0
MKI67	This gene is widely used as a proliferation marker, yet its molecular mechanism is unknown. Recent study suggested that this gene Ki-67 is required to maintain individual mitotic chromosomes dispersed in the cytoplasm after their release from the mechanically rigid nuclear envelope. and might provide this function through a surfactant mechanism at the phase boundary between mitotic chromatin and …	7	1
TRIP4	This gene is a component of the nuclear receptor-coupled co-activation mechinery that enable or disable DNA transcription. Recent study suggests that this gene has a role in cellular maintenance and survival.	2	0
CSMD1	This gene is a membrane-bound complement inhibitor suggested to act as a putative tumor suppressor gene. And this gene has been proposed to have an active role in cell cycle regulation and controlling apoptosis, for example via the Smad pathway in melanoma cells.	14	1

## Sheet: Sheet1
	Gene	Function	Reported Relative Cancer	Pubmed	UniProtKB	Pubmed	Reported Related Cancer
	PCDH18	This gene belongs to the protocadherin gene family, a subfamily of the cadherin superfamily. Although its specific function is undetermined, the cadherin-related neuronal receptor is thought to play a role in the establishment and function of specific cell-cell connections in the brain.	Not reported	This gene belongs to the protocadherin gene family, a subfamily of the cadherin superfamily. This gene encodes a protein which contains 6 extracellular cadherin domains, a transmembrane domain and a cytoplasmic tail differing from those of the classical cadherins. Although its specific function is undetermined, the cadherin-related neuronal receptor is thought to play a role in the establishment …		This gene belongs to the protocadherin gene family, a subfamily of the cadherin superfamily. This gene encodes a protein which contains 6 extracellular cadherin domains, a transmembrane domain and a cytoplasmic tail differing from those of the classical cadherins. Although its specific function is undetermined, the cadherin-related neuronal receptor is thought to play a role in the establishment …
	KIAA2026	Unknown	Not reported	Unknown	Unknown	Unknown
	ALKBH3	The Escherichia coli AlkB protein protects against the cytotoxicity of methylating agents by repair of the specific DNA lesions generated in single-stranded DNA. ALKBH2 (MIM 610602) and ALKBH3 are E. coli AlkB homologs that catalyze the removal of 1-methyladenine and 3-methylcytosine		The Escherichia coli AlkB protein protects against the cytotoxicity of methylating agents by repair of the specific DNA lesions generated in single-stranded DNA. ALKBH2 (MIM 610602) and ALKBH3 are E. coli AlkB homologs that catalyze the removal of 1-methyladenine and 3-methylcytosine (Duncan et al., 2002 [PubMed 12486230]).[supplied by OMIM, Mar 2008]	Dioxygenase that mediates demethylation of DNA and RNA containing 1-methyladenosine (m1A) (PubMed:12486230, PubMed:12594517, PubMed:16174769, PubMed:26863196, PubMed:26863410). Repairs alkylated DNA containing 1-methyladenosine (m1A) and 3-methylcytosine (m3C) by oxidative demethylation (PubMed:12486230, PubMed:12594517, PubMed:16174769). Has a strong preference for single-stranded DNA (PubMed:12…	The Escherichia coli AlkB protein protects against the cytotoxicity of methylating agents by repair of the specific DNA lesions generated in single-stranded DNA. ALKBH2 (MIM 610602) and ALKBH3 are E. coli AlkB homologs that catalyze the removal of 1-methyladenine and 3-methylcytosine (Duncan et al., 2002 [PubMed 12486230]).[supplied by OMIM, Mar 2008]
	CCDC168	Unknown	Not reported	Unknown	Unknown	Unknown
	CYP2R1	This gene encodes a member of the cytochrome P450 superfamily of enzymes. This enzyme is a microsomal vitamin D hydroxylase that converts vitamin D into the active ligand for the vitamin D receptor.		This gene encodes a member of the cytochrome P450 superfamily of enzymes. The cytochrome P450 proteins are monooxygenases which catalyze many reactions involved in drug metabolism and synthesis of cholesterol, steroids and other lipids. This enzyme is a microsomal vitamin D hydroxylase that converts vitamin D into the active ligand for the vitamin D receptor. A mutation in this gene has been asso…	Has a D-25-hydroxylase activity on both forms of vitamin D, vitamin D2 and D3.	This gene encodes a member of the cytochrome P450 superfamily of enzymes. The cytochrome P450 proteins are monooxygenases which catalyze many reactions involved in drug metabolism and synthesis of cholesterol, steroids and other lipids. This enzyme is a microsomal vitamin D hydroxylase that converts vitamin D into the active ligand for the vitamin D receptor. A mutation in this gene has been asso…
	PER1	PER1 is an important circadian clock gene. PER1 can regulate downstream cell cycle genes.	head-neck carcinoma, prostatic cancer, breast cancer, colorectal cancer, and endometrial cancer.	This gene is a member of the Period family of genes and is expressed in a circadian pattern in the suprachiasmatic nucleus, the primary circadian pacemaker in the mammalian brain. Genes in this family encode components of the circadian rhythms of locomotor activity, metabolism, and behavior. This gene is upregulated by CLOCK/ARNTL heterodimers but then represses this upregulation in a feedback lo…	Transcriptional repressor which forms a core component of the circadian clock. The circadian clock, an internal time-keeping system, regulates various physiological processes through the generation of approximately 24 hour circadian rhythms in gene expression, which are translated into rhythms in metabolism and behavior. It is derived from the Latin roots 'circa' (about) and 'diem' (day) and acts…	This gene is a member of the Period family of genes and is expressed in a circadian pattern in the suprachiasmatic nucleus, the primary circadian pacemaker in the mammalian brain. Genes in this family encode components of the circadian rhythms of locomotor activity, metabolism, and behavior. This gene is upregulated by CLOCK/ARNTL heterodimers but then represses this upregulation in a feedback lo…
	OSCP1		Not reported	NA	May be involved in drug clearance in the placenta.	NA
	ITGB8	This protein noncovalently binds to an alpha subunit to form a heterodimeric integrin complex. In general, integrin complexes mediate cell-cell and cell-extracellular matrix interactions and this complex plays a role in human airway epithelial proliferation.		This gene is a member of the integrin beta chain family and encodes a single-pass type I membrane protein with a VWFA domain and four cysteine-rich repeats. This protein noncovalently binds to an alpha subunit to form a heterodimeric integrin complex. In general, integrin complexes mediate cell-cell and cell-extracellular matrix interactions and this complex plays a role in human airway epithelia…	Integrin alpha-V/beta-8 is a receptor for fibronectin.	This gene is a member of the integrin beta chain family and encodes a single-pass type I membrane protein with a VWFA domain and four cysteine-rich repeats. This protein noncovalently binds to an alpha subunit to form a heterodimeric integrin complex. In general, integrin complexes mediate cell-cell and cell-extracellular matrix interactions and this complex plays a role in human airway epithelia…
	INTS12	INTS12 is a subunit of the Integrator complex, which associates with the C-terminal domain of RNA polymerase II large subunit (POLR2A; MIM 180660) and mediates 3-prime end processing of small nuclear RNAs U1 (RNU1; MIM 180680) and U2 (RNU2; MIM 180690)		INTS12 is a subunit of the Integrator complex, which associates with the C-terminal domain of RNA polymerase II large subunit (POLR2A; MIM 180660) and mediates 3-prime end processing of small nuclear RNAs U1 (RNU1; MIM 180680) and U2 (RNU2; MIM 180690) (Baillat et al., 2005 [PubMed 16239144]).[supplied by OMIM, Mar 2008]	Component of the Integrator complex, a complex involved in the small nuclear RNAs (snRNA) U1 and U2 transcription and in their 3'-box-dependent processing. The Integrator complex is associated with the C-terminal domain (CTD) of RNA polymerase II largest subunit (POLR2A) and is recruited to the U1 and U2 snRNAs genes.	INTS12 is a subunit of the Integrator complex, which associates with the C-terminal domain of RNA polymerase II large subunit (POLR2A; MIM 180660) and mediates 3-prime end processing of small nuclear RNAs U1 (RNU1; MIM 180680) and U2 (RNU2; MIM 180690) (Baillat et al., 2005 [PubMed 16239144]).[supplied by OMIM, Mar 2008]
	TECTA	One of the major non-collagenous components of the tectorial membrane. The tectorial membrane is an extracellular matrix of the inner ear that contacts the stereocilia bundles of specialized sensory hair cells.		The tectorial membrane is an extracellular matrix of the inner ear that contacts the stereocilia bundles of specialized sensory hair cells. Sound induces movement of these hair cells relative to the tectorial membrane, deflects the stereocilia, and leads to fluctuations in hair-cell membrane potential, transducing sound into electrical signals. Alpha-tectorin is one of the major noncollagenous co…	One of the major non-collagenous components of the tectorial membrane (By similarity). The tectorial membrane is an extracellular matrix of the inner ear that covers the neuroepithelium of the cochlea and contacts the stereocilia bundles of specialized sensory hair cells. Sound induces movement of these hair cells relative to the tectorial membrane, deflects the stereocilia and leads to fluctuati…	The tectorial membrane is an extracellular matrix of the inner ear that contacts the stereocilia bundles of specialized sensory hair cells. Sound induces movement of these hair cells relative to the tectorial membrane, deflects the stereocilia, and leads to fluctuations in hair-cell membrane potential, transducing sound into electrical signals. Alpha-tectorin is one of the major noncollagenous co…
	MKI67	Required to maintain individual mitotic chromosomes dispersed in the cytoplasm following nuclear envelope disassembly		This gene encodes a nuclear protein that is associated with and may be necessary for cellular proliferation. Alternatively spliced transcript variants have been described. A related pseudogene exists on chromosome X. [provided by RefSeq, Mar 2009]	Required to maintain individual mitotic chromosomes dispersed in the cytoplasm following nuclear envelope disassembly (PubMed:27362226). Associates with the surface of the mitotic chromosome, the perichromosomal layer, and covers a substantial fraction of the chromosome surface (PubMed:27362226). Prevents chromosomes from collapsing into a single chromatin mass by forming a steric and electrostat…	This gene encodes a nuclear protein that is associated with and may be necessary for cellular proliferation. Alternatively spliced transcript variants have been described. A related pseudogene exists on chromosome X. [provided by RefSeq, Mar 2009]
	TRIP4	This gene encodes a subunit of the tetrameric nuclear activating signal cointegrator 1 (ASC-1) complex, which associates with transcriptional coactivators, nuclear receptors and basal transcription factors to facilitate nuclear receptors-mediated transcription. which mediates interaction with transcriptional coactivators and ligand-bound nuclear receptors, such as thyroid hormone receptor and ret…	Brest Cancer	This gene encodes a subunit of the tetrameric nuclear activating signal cointegrator 1 (ASC-1) complex, which associates with transcriptional coactivators, nuclear receptors and basal transcription factors to facilitate nuclear receptors-mediated transcription. This protein is localized in the nucleus and contains an E1A-type zinc finger domain, which mediates interaction with transcriptional coa…	Transcription coactivator which associates with nuclear receptors, transcriptional coactivators including EP300, CREBBP and NCOA1, and basal transcription factors like TBP and TFIIA to facilitate nuclear receptors-mediated transcription. May thereby play an important role in establishing distinct coactivator complexes under different cellular conditions. Plays a role in thyroid hormone receptor a…	This gene encodes a subunit of the tetrameric nuclear activating signal cointegrator 1 (ASC-1) complex, which associates with transcriptional coactivators, nuclear receptors and basal transcription factors to facilitate nuclear receptors-mediated transcription. This protein is localized in the nucleus and contains an E1A-type zinc finger domain, which mediates interaction with transcriptional coa…
	CSMD1	CSMD1 is a membrane-bound complement inhibitor. and CSMD1 suggested to act as a putative sumor suppressor gene. In melanoma cells CSMD1 has been proposed to have an active role in cell cycle regulation and controlling apoptosis, for example via the Smad pathway.	Melanoma, Brest cancer, head and neck cancer, oral squamous cell carcinoma, prostate colorectal liver, lung skin	No	Potential suppressor of squamous cell carcinomas.	No
